# Supplementary material for: Mo2C catalyst leads to highly efficient hydrogen transfer of alcohols and amines to synthesize N-alkylamines
Source: Royal Society of Chemistry journal article supplement (doi:10.1039/d4cc04327h), 2024-01-01
Supplement: d4cc04327h1.pdf [file d4cc04327h1.pdf]

## Supporting Information

# **Mo<sub>2</sub>C Catalyst Leads to Highly Efficient Hydrogen Transfer of Alcohols and Amines to Synthesize N-alkylamines**

Yimei Chen,<sup>a</sup> Zhe Wang,<sup>a</sup> Zhouyang Long,<sup>\*,b</sup> Yunfei Wang,<sup>a</sup> Pingbo Zhang,<sup>a</sup> Yan Leng <sup>\*,a</sup>

<sup>a</sup> The Key Laboratory of Synthetic and Biological Colloids, Ministry of Education, School of Chemical and Material Engineering, Jiangnan University, Wuxi 214122, Jiangsu, China. E-mail: [yanleng@jiangnan.edu.cn](mailto:yanleng@jiangnan.edu.cn)

<sup>b</sup> Jiangsu Key Laboratory of Green Synthetic Chemistry for Functional Materials, School of Chemistry & Materials Science, Jiangsu Normal University, Xuzhou 221116, China.

### **Experimental section**

#### **Synthesis of TMC-based catalysts**

The Mo-containing metal-organic hybrid was prepared by ball milling of tannin (1.0 g) and MoCl<sub>5</sub> (0.3 g) for 30 min. The hybrid was carbonized in nitrogen to yield the black solid sample Mo<sub>2</sub>C@C<sub>900</sub> (from ambient temperature to 400°C at 5°C/min and maintained at 400°C for 1 h, then from 400°C to 900°C at 5°C/min and maintained at 900°C for 2 h). MoO<sub>2</sub>@C<sub>600</sub> and Mo<sub>2</sub>C-MoO<sub>2</sub>@C<sub>800</sub> were prepared based on the same method with the maximum calcination temperature of 600°C and 800°C, respectively. WC and NbC were prepared accordingly by using WCl<sub>6</sub> and NbCl<sub>5</sub> as the metal precursors, respectively.

#### **Characterization**

X-ray diffraction (XRD) patterns were collected on the Bruker D8 Advance powder diffractometer using Ni-filtered Cu/K $\alpha$  radiation at 40 kV and 20 mA, from 5° to 90° with a scan rate of 5°/min. Transmission electron microscope (TEM) images were obtained with a JEOL JEM-2100 electron microscope operated at 200 kV. Hydrogen temperature-programmed desorption (H<sub>2</sub>-TPD) was carried out with a BELCAT- II chemisorption instrument from 50° C to 800° C. X-ray photoelectron spectroscopy (XPS) was conducted with an Axis supra X-ray photoelectron spectrometer equipped with an Al K $\alpha$  radiation source to analyze the chemical environment of each element in the sample. Nitrogen adsorption-desorption analysis was carried out to determine the specific surface area and porous structure of the catalysts using an ASAP2460 fully automated specific surface and porosity analyzer at a temperature of 77 K in liquid nitrogen.

### **Catalytic tests**

**Hydrogen transfer coupling of amines and alcohols.** A mixture of amine (1 mmol), alcohol (2 mmol), catalyst (20 mg), base (1 mmol), and solvent (1 mL) was added to a pressure tube. Then the tube was purged with nitrogen gas and sealed with a PTFE plug. The reaction was stirred in an oil bath at 150°C for 24 h. On completion, the reaction mixture was cooled to room temperature, the catalyst was filtered off, and the liquid was analyzed by GC-FID (GC 9720). The recovered catalyst was directly used in the next run to test its stability.

**Benzyl alcohol dehydrogenation.** A mixture of benzyl alcohol (2 mmol), catalyst (20 mg), and xylene (4 mL) was added to a distillation flask. The reaction was then refluxed at 120°C for 6 hours. On completion, the reaction mixture was cooled to room temperature, the catalyst was filtered off, and the liquid was analyzed by GC-FID.

**Synthesis of N-benzylideneaniline.** A mixture of aniline (1 mmol), benzaldehyde (1 mmol), and toluene (1 mL) was added to a pressure tube. Then the tube was purged with nitrogen and sealed with a PTFE plug. The reaction was stirred in an oil bath at 150 °C for 1 h. On completion, the reaction mixture was cooled to room temperature, and the liquid was analyzed by GC-FID.

**Synthesis of N-benzylaniline.** A mixture of benzyl alcohol (1 mmol), N-benzylaniline (1 mmol), catalyst (20 mg), and toluene (1 mL) was added to a pressure tube. Then the tube was purged with nitrogen and sealed with a PTFE plug. The reaction was stirred in an oil bath at 150 °C for 8 h. On completion, the reaction mixture was cooled to room temperature, the catalyst was filtered off, and the liquid was analyzed by GC-FID.

### **Details for DFT calculations**

Density functional theory (DFT) calculations in this work were carried out using ORCA (version: 5.0.3), DFT calculations details: Geometry optimization and vibrational frequency calculations were conducted at the B3LYP/def2-SVP (with

DFT-D3 correction) level of theory.<sup>1</sup> The single point calculations for the optimized geometries were performed to obtain accurate energies at the B3LYP/def2-TZVP (with DFT-D3 correction) level of theory level of theory. The RIJCOSX approximation was applied with the def2/J auxiliary basis set.<sup>2</sup> The solvent effect of toluene was evaluated by the CPCM solvation model. The Gibbs free energies were included in the Gibbs energy correction of unscaled vibrational analysis at the B3LYP/def2-SVP (with DFT-D3 correction) level of theory.

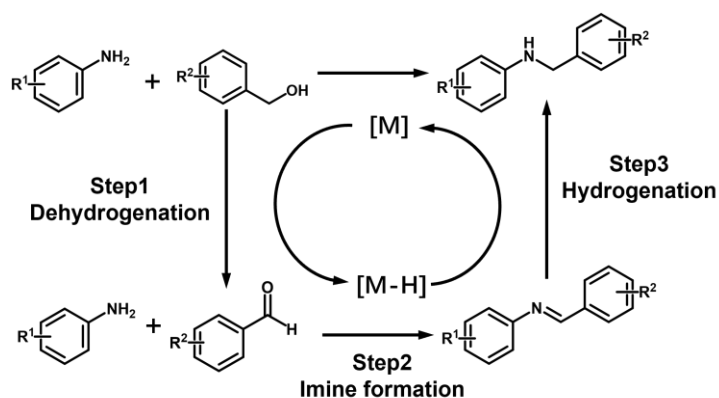

**Catalysts for previous:**

- (1) Precious metal catalysts: Ru/CeO<sub>2</sub>-R, Co<sub>2</sub>Rh<sub>2</sub>/C, PdCl<sub>2</sub>/dppe, etc
- (2) Transition metal catalysts: Ni/θ-Al<sub>2</sub>O<sub>3</sub>, Fe<sub>20</sub>-SA@NSC, Cu/CeO<sub>2</sub>-P, etc
- (3) Metal organic catalysts: Zn(La)Cl<sub>2</sub>, W(phen)(CO)<sub>4</sub>, Co(II)-NNN, etc

**Catalysts for this work:**

**Carbonised metal catalyst: Mo<sub>2</sub>C**

**Scheme S1.** Hydrogen borrowing (hydrogen transfer) mechanism for N-alkylation of amines with alcohols (M = transition metal) based on catalysts.

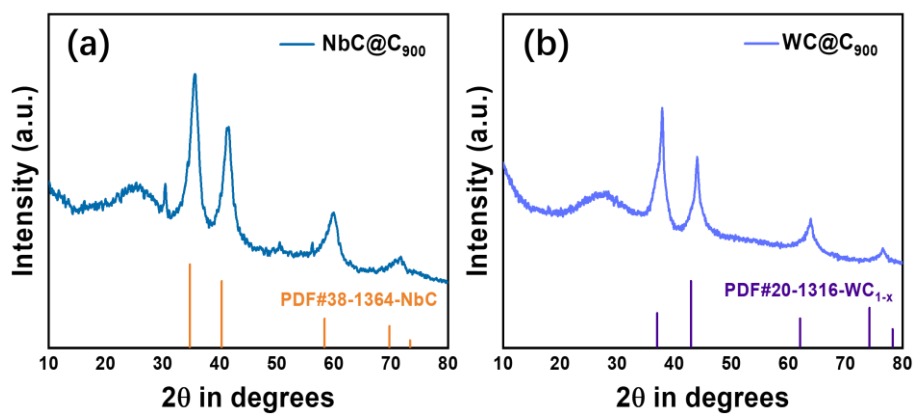

**Figure S1.** XRD patterns of (a) NbC@C<sub>900</sub> and (b) WC@C<sub>900</sub>.

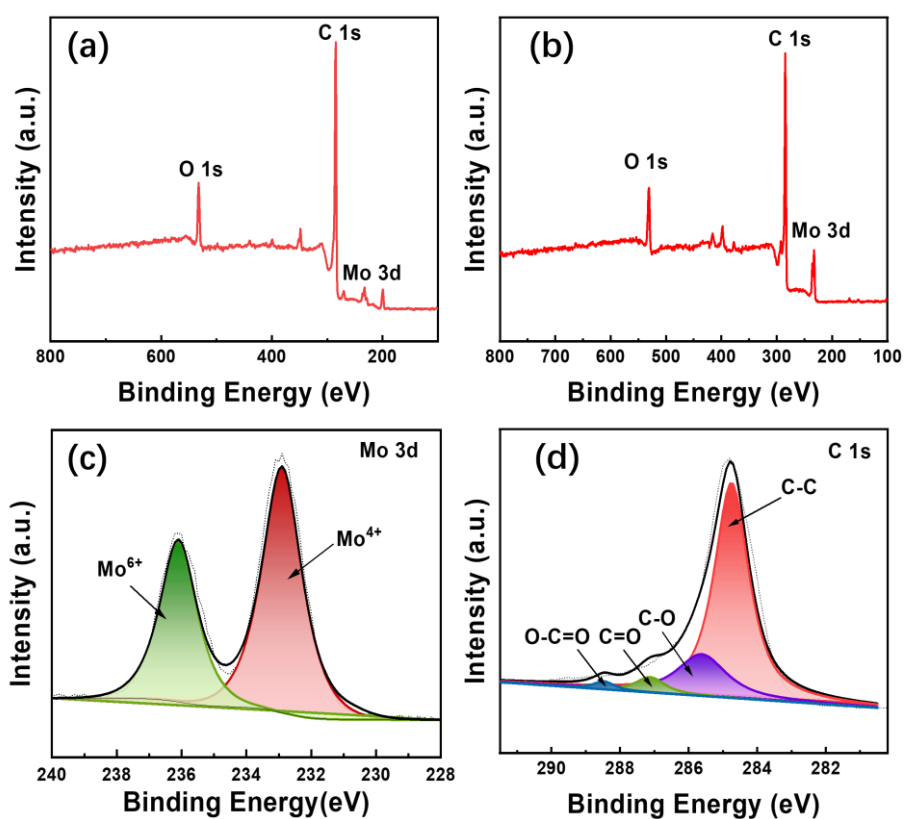

**Figure S2.** (a) XPS spectrum of Mo<sub>2</sub>C@C<sub>900</sub>, (b) XPS spectrum of Mo<sub>2</sub>C-MoO<sub>2</sub>@C<sub>800</sub>, (c) Mo 3d and (d) C 1s XPS spectra of Mo<sub>2</sub>C-MoO<sub>2</sub>@C<sub>800</sub>.

**Table S1.** Results of catalytic performance of hydrogen transfer reactions over various reported catalysts.

| Catalyst                                             | Reaction condition                                                                                                                               | Con (%)       | Sel (%)       | Yield (%) | Ref.             |
|------------------------------------------------------|--------------------------------------------------------------------------------------------------------------------------------------------------|---------------|---------------|-----------|------------------|
| MnCl <sub>2</sub>                                    | catalyst 10 mol%, PPh <sub>3</sub> 20 mol%, benzyl alcohol 1.2 equiv, aniline 1 mmol, KOt-Bu 1.2 equiv, PhMe 2 mL, N <sub>2</sub> , 130°C, 20 h. |               |               | 82        | 3                |
| TiOH                                                 | catalyst 0.1 g, benzyl alcohol 4.62 mmol, aniline 21.5 mmol, xylene 2 g, N <sub>2</sub> , 180°C, 15 h.                                           |               |               | 99.6      | 4                |
| TiO <sub>2</sub>                                     | catalyst 10mol%, benzyl alcohol 1.3 equiv, aniline 0.35 mmol, KOH 0.27 mmol, toluene 1.0 mL, 140°C, 24 h.                                        |               |               | 99        | 5                |
| Zn(La)Cl <sub>2</sub>                                | catalyst 3.0 mol%, benzyl alcohol 1.2 mmol, aniline 1.0 mmol, KOt-Bu 0.5 equiv, toluene 3 mL, Ar, 120°C, 16 h.                                   |               |               | 78        | 6                |
| NiBr <sub>2</sub>                                    | catalyst 0.025 mmol, L1 0.05 mmol, benzyl alcohol 1.0 mmol, aniline 0.25 mmol, KOt-Bu 0.25 mmol, toluene 2.0 mL, N <sub>2</sub> , 130°C, 48 h.   | 99            |               | 96        | 7                |
| Ni(COD) <sub>2</sub>                                 | catalyst 3 mol%, benzyl alcohol 1.5 equiv, aniline 0.5 mmol, KOH 0.3 equiv, CPME 2.0 mL, Ar, 140°C, 18 h.                                        | >99           | >99           |           | 8                |
| Cat-6                                                | catalyst 0.05 mmol, benzyl alcohol 0.6 mmol, aniline 0.5 mmol, KOt-Bu 0.5 mmol, 1,4-dioxane 1.0mL, N <sub>2</sub> , 130°C, 24 h.                 | 98            |               | 95        | 9                |
| Zn(NO <sub>3</sub> ) <sub>2</sub> ·6H <sub>2</sub> O | catalyst 15.0 mol%, benzyl alcohol 1.5 mmol, aniline 1.0 mmol, KOt-Bu 1.00 mmol, toluene 1.5 mL, N <sub>2</sub> , 140°C, 36 h.                   | 100           |               | 98        | 10               |
| Fe <sub>20</sub> -SA@NSC                             | catalyst 0.02 g, benzyl alcohol 6 mmol, aniline 3 mmol, KOH 0.3 equiv, Ar, 135°C, 24 h.                                                          |               |               | 94        | 11               |
| Cu/CeO <sub>2</sub> -P                               | catalyst 0.05 g, benzyl alcohol 1.2 mmol, aniline 1.0 mmol, toluene 2 mL, Ar, 160°C, 12 h.                                                       | >99           | 88            | 88        | 12               |
| Ni/θ-Al <sub>2</sub> O <sub>3</sub>                  | catalyst 1 mol%, benzyl alcohol 1.2 mmol, aniline 1.0 mmol, o-xylene 1.5 g, reflux, 144°C, 3 h.                                                  | 100           |               | 99        | 13               |
| Ni <sub>9,5</sub> /NC                                | catalyst 0.1 g, benzyl alcohol 2 mmol, aniline 1 mmol, toluene 10 mL, Ar 1 bar, 160°C, 4 h.                                                      | 99            | 92            |           | 14               |
| Ni/Ru@SBA                                            | catalyst 3 mol%(Ni), benzyl alcohol 0.5 mmol, aniline 0.5 mmol, neat toluene 2 mL, 120°C, 24 h.                                                  | 99            |               | 99        | 15               |
| Ru/CeO <sub>2</sub> -R                               | catalyst 0.2 g, benzyl alcohol 6 mmol, aniline 2 mmol, p-xylene 2 mL, N <sub>2</sub> , 160°C, 24 h.                                              | 99            | 88            |           | 16               |
| Cu <sub>2</sub> /NPC-550                             | catalyst 0.05 g, benzyl alcohol 1 mmol, aniline 0.5 mmol, cyclohexane 3 mL, KOH 0.03g, Ar, 140°C, 12 h.                                          | 100           | 95            |           | 17               |
| Mo <sub>2</sub> C@C <sub>900</sub>                   | <b>catalyst 0.025 g, benzyl alcohol 2 mmol, aniline 1 mmol, KOH 1mmol, toluene 1 mL, N<sub>2</sub>, 150°C, 24 h.</b>                             | <b>&gt;99</b> | <b>&gt;99</b> |           | <b>This work</b> |

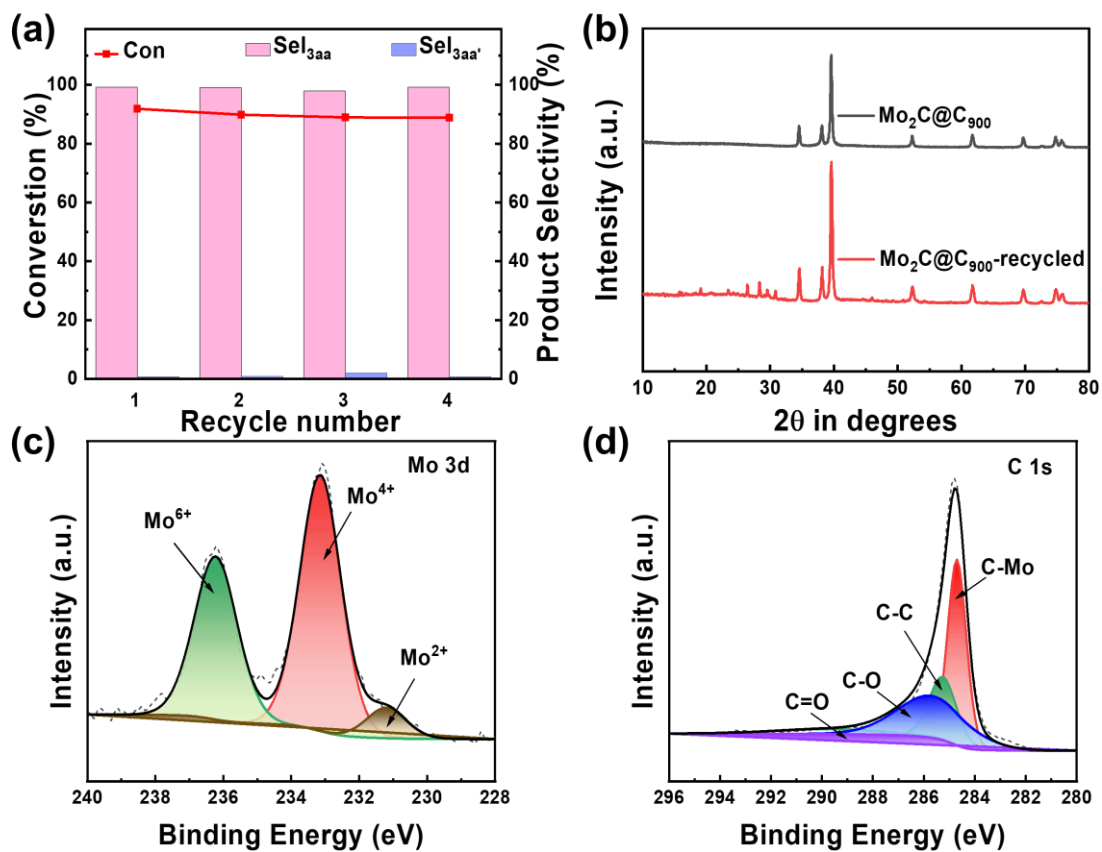

**Figure S3.** (a) Reusability of  $\text{Mo}_2\text{C}@C_{900}$ -catalyzed hydrogen transfer coupling of benzyl alcohol and aniline, (b) XRD patterns of fresh  $\text{Mo}_2\text{C}@C_{900}$  and recycled  $\text{Mo}_2\text{C}@C_{900}$ . (c) Mo 3d and (d) C 1s XPS spectra of recycled  $\text{Mo}_2\text{C}@C_{900}$ .

**Table S2.** Optimization of reaction conditions.<sup>a</sup>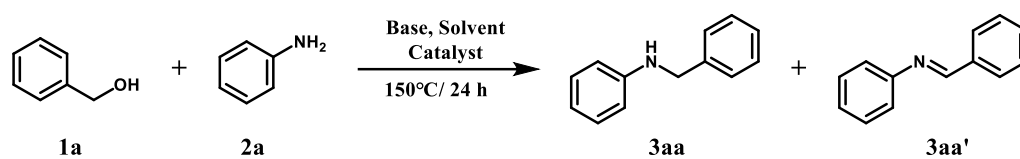

| Entry           | Catalyst                           | Base and amount (mmol)             | Solvent     | Ratio <sup>b</sup> | Con <sup>c</sup> (%) | Sel <sup>c</sup> (%) |      |        |
|-----------------|------------------------------------|------------------------------------|-------------|--------------------|----------------------|----------------------|------|--------|
|                 |                                    |                                    |             |                    |                      | 3aa                  | 3aa' | Others |
| 1               | Mo <sub>2</sub> C@C <sub>900</sub> | KOH (0.3)                          | toluene     | 2.0:1              | 34.6                 | 92.1                 | 7.0  | 0.9    |
| 2               | Mo <sub>2</sub> C@C <sub>900</sub> | KOH (0.5)                          | toluene     | 2.0:1              | 64.3                 | 95.3                 | 4.4  | 0.3    |
| 3               | Mo <sub>2</sub> C@C <sub>900</sub> | KOH (0.7)                          | toluene     | 2.0:1              | 82.2                 | 98.3                 | 1.4  | 0.3    |
| 4               | Mo <sub>2</sub> C@C <sub>900</sub> | KOH (1)                            | toluene     | 2.0:1              | 92.7                 | 99.2                 | 0.8  | 0.0    |
| 5               | Mo <sub>2</sub> C@C <sub>900</sub> | NaOH (1)                           | toluene     | 2.0:1              | 16.6                 | 79.4                 | 18.1 | 2.5    |
| 6               | Mo <sub>2</sub> C@C <sub>900</sub> | t-KOBu (1)                         | toluene     | 2.0:1              | 50.8                 | 96.8                 | 2.7  | 0.5    |
| 7               | Mo <sub>2</sub> C@C <sub>900</sub> | K <sub>2</sub> CO <sub>3</sub> (1) | toluene     | 2.0:1              | 1.7                  | 12.2                 | 65.1 | 22.7   |
| 8               | Mo <sub>2</sub> C@C <sub>900</sub> | KOH (1)                            | xylene      | 2.0:1              | 40.5                 | 92.9                 | 5.9  | 1.2    |
| 9               | Mo <sub>2</sub> C@C <sub>900</sub> | KOH (1)                            | 1,4-dioxane | 2.0:1              | 25.3                 | 90.0                 | 9.3  | 0.6    |
| 10              | Mo <sub>2</sub> C@C <sub>900</sub> | KOH (1)                            | /           | 9.2:1              | 38.6                 | 76.5                 | 7.2  | 16.3   |
| 11              | Mo <sub>2</sub> C@C <sub>900</sub> | KOH (1)                            | toluene     | 1.2:1              | 46.2                 | 95.9                 | 4.1  | 0.0    |
| 12              | Mo <sub>2</sub> C@C <sub>900</sub> | KOH (1)                            | toluene     | 1.5:1              | 72.6                 | 99.0                 | 0.9  | 0.1    |
| 13 <sup>d</sup> | Mo <sub>2</sub> C@C <sub>900</sub> | KOH (1)                            | toluene     | 2.0:1              | 99.2                 | 99.5                 | 0.5  | 0.0    |
| 14 <sup>e</sup> | Mo <sub>2</sub> C@C <sub>900</sub> | KOH (1)                            | toluene     | 2.0:1              | 47.0                 | 95.9                 | 3.5  | 0.6    |
| 15 <sup>f</sup> | Mo <sub>2</sub> C@C <sub>900</sub> | KOH (1)                            | toluene     | 2.0:1              | 97.0                 | 99.5                 | 0.5  | 0.0    |
| 16              | Mo <sub>2</sub> C@C <sub>900</sub> | /                                  | toluene     | 2.0:1              | 12.1                 | 50.2                 | 40.0 | 9.8    |
| 17              | -                                  | KOH (1)                            | toluene     | 2.0:1              | 21.9                 | 68.8                 | 28.8 | 2.4    |

<sup>a</sup> Reaction conditions: 1a (2 mmol), 2a (1 mmol), base (1 mmol), Mo<sub>2</sub>C@C<sub>900</sub> (0.02 g), solvent (1 mL), at 150°C for 24 h. <sup>b</sup> Reaction uses different molar ratios of benzyl alcohol and aniline. <sup>c</sup> Conversion and selectivity were determined by GC analysis. <sup>d</sup> Mo<sub>2</sub>C@C<sub>900</sub> (0.025 g). <sup>e</sup> Mo<sub>2</sub>C@C<sub>900</sub> (0.02 g), at 140°C for 24 h. <sup>f</sup> Mo<sub>2</sub>C@C<sub>900</sub> (0.02 g), at 160 °C for 24 h.



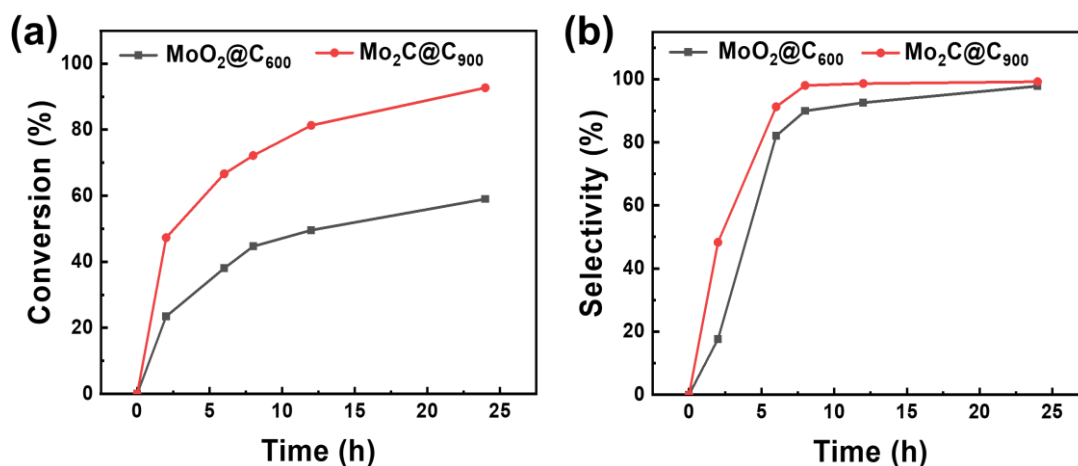

**Figure S4.** (a) Conversion of aniline on MoO<sub>2</sub>@C<sub>600</sub> and Mo<sub>2</sub>C@C<sub>900</sub> with reaction time, (b) Selectivity of N-benzylaniline on MoO<sub>2</sub>@C<sub>600</sub> and Mo<sub>2</sub>C@C<sub>900</sub> with reaction time.

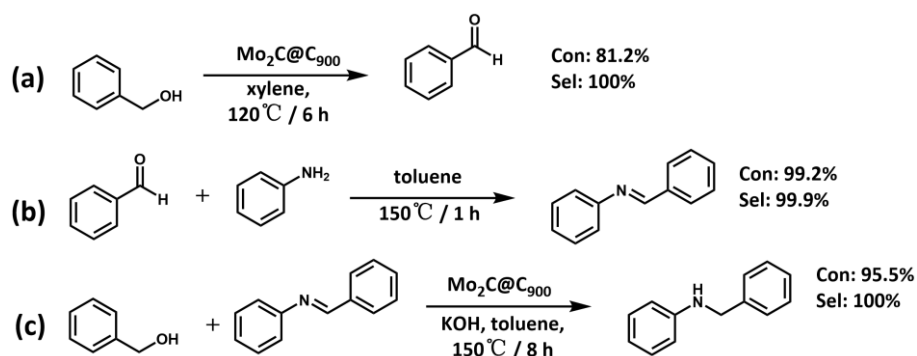

**Scheme S2.** (a) The dehydrogenation of benzyl alcohol, (b) The condensation reaction of benzaldehyde and aniline, (c) The hydrogenation of N-benzylideneaniline with benzyl alcohol as hydrogen source.

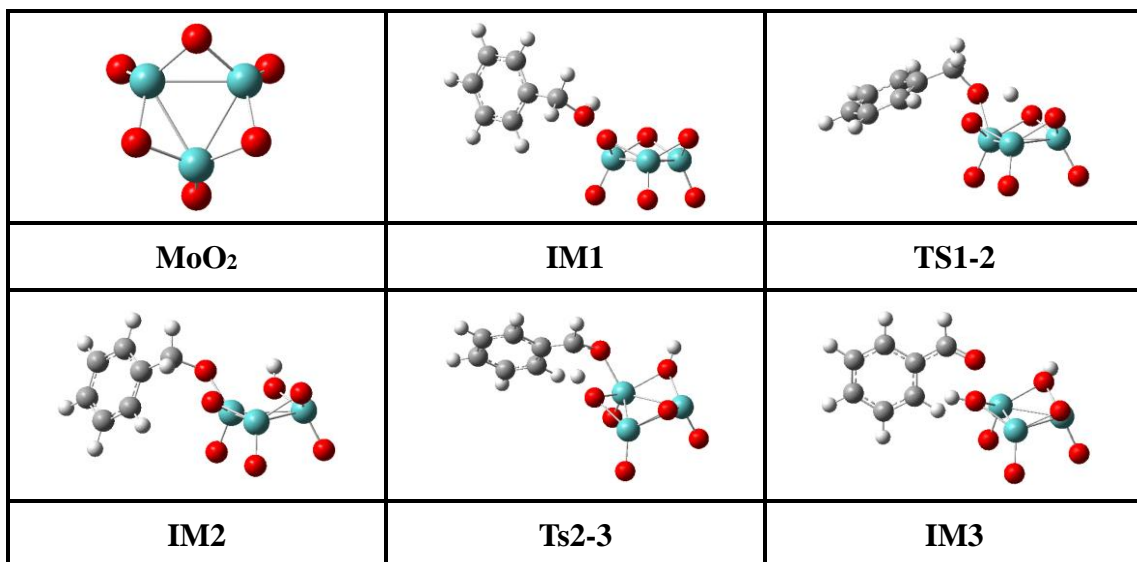

**Figure S5.** Benzyl alcohol selective oxidation to benzaldehyde on MoO<sub>2</sub> with the initial structure, transition state and the final structure.

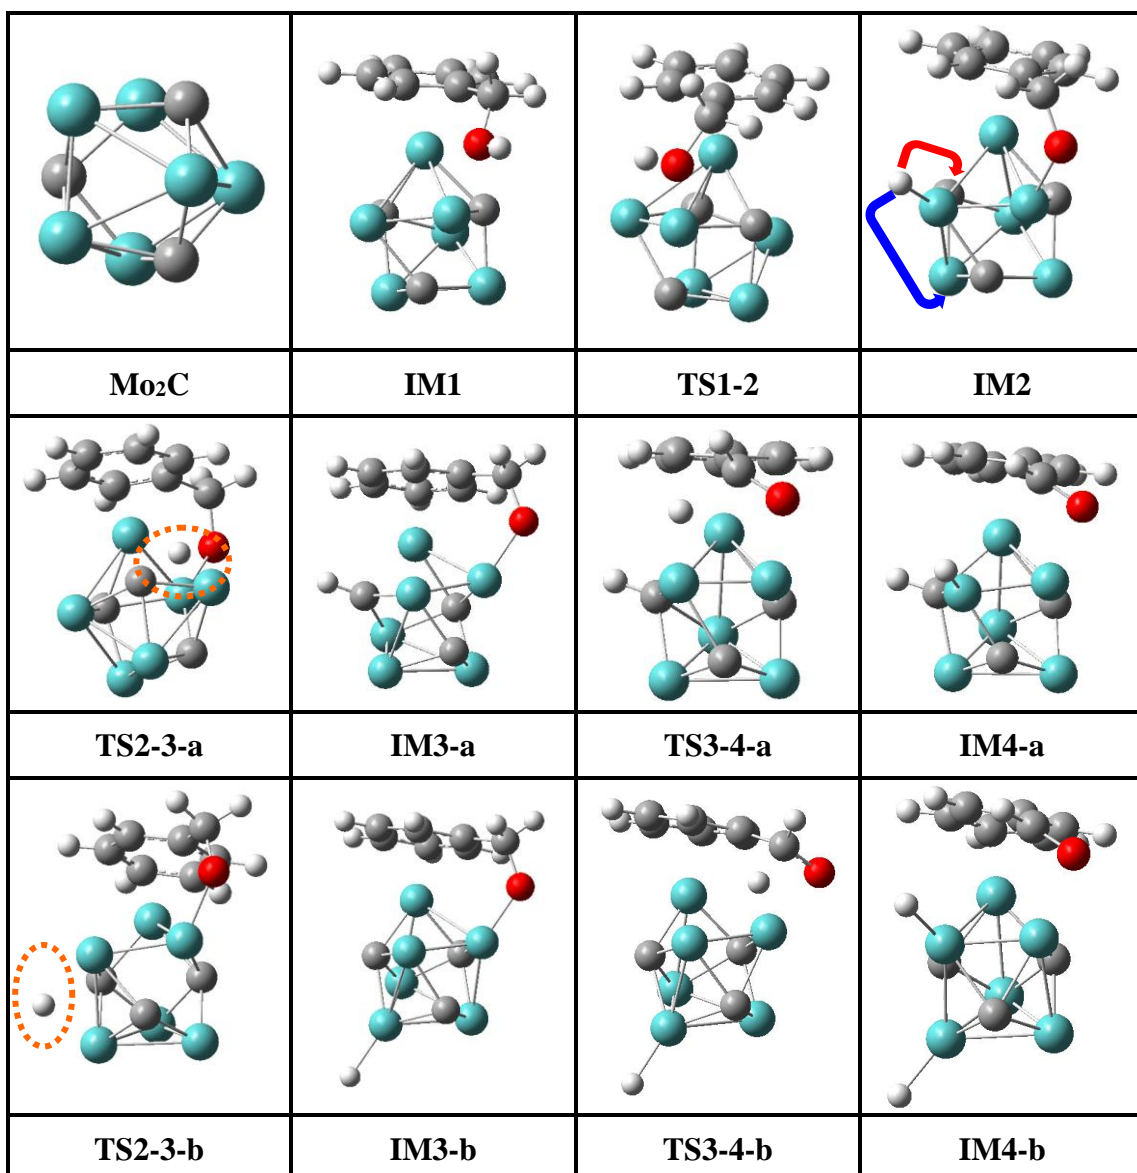

**Figure S6.** Benzyl alcohol selective oxidation to benzaldehyde on Mo<sub>2</sub>C with the initial structure, transition state and the final structure.

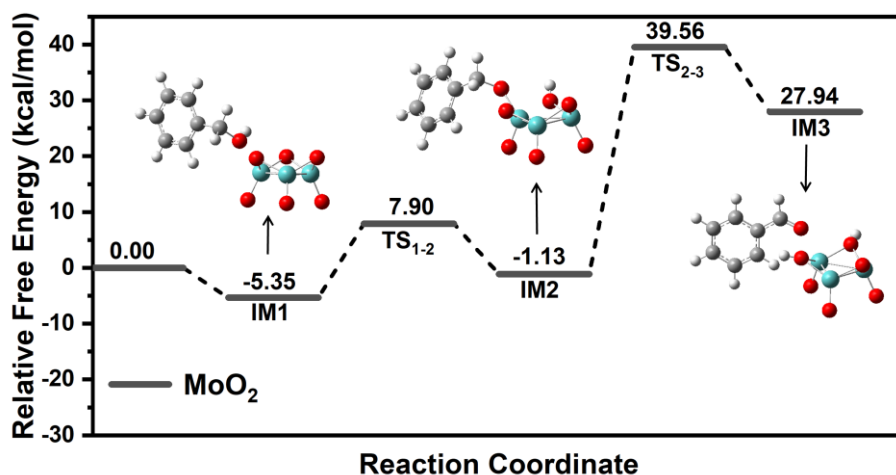

**Figure S7.** Calculated structures of the intermediates in benzyl alcohol dehydrogenation on MoO<sub>2</sub>, and the corresponding energy profile.

## Notes and references

1. F. Weigend and R. Ahlrichs, *Phys Chem Chem Phys*, 2005, **7**, 3297-3305.
2. F. Neese, F. Wennmohs, A. Hansen and U. Becker, *Chemical Physics*, 2009, **356**, 98-109.
3. D. Wei, P. Yang, C. Yu, F. Zhao, Y. Wang and Z. Peng, *J Org Chem*, 2021, **86**, 2254-2263.
4. F. Niu, Q. Wang, Z. Yan, B. T. Kusema, A. Y. Khodakov and V. V. Ordonsky, *ACS Catalysis*, 2020, **10**, 3404-3414.
5. R. Upadhyay and S. K. Maurya, *J Org Chem*, 2023, **88**, 16960-16966.
6. S. Chakraborty, R. Mondal, S. Pal, A. K. Guin, L. Roy and N. D. Paul, *J Org Chem*, 2023, **88**, 771-787.
7. M. Vellakaran, K. Singh and D. Banerjee, *ACS Catalysis*, 2017, **7**, 8152-8158.
8. A. Afanasenko, S. Elangovan, M. C. A. Stuart, G. Bonura, F. Frusteri and K. Barta, *Catalysis Science & Technology*, 2018, **8**, 5498-5505.
9. X. B. Lan, Z. Ye, C. Yang, W. Li, J. Liu, M. Huang, Y. Liu and Z. Ke, *ChemSusChem*, 2021, **14**, 860-865.
10. V. Sankar, M. Kathiresan, B. Sivakumar and S. Mannathan, *Advanced Synthesis & Catalysis*, 2020, **362**, 4409-4414.
11. G.-P. Lu, H. Shan, Y. Lin, K. Zhang, B. Zhou, Q. Zhong and P. Wang, *Journal of Materials Chemistry A*, 2021, **9**, 25128-25135.
12. X. Wang, T. Li, H. Wang, K. Zhao, Y. Huang, H. Yuan, X. Cui and F. Shi, *Journal of Catalysis*, 2023, **418**, 163-177.
13. K.-i. Shimizu, N. Imaiida, K. Kon, S. M. A. Hakim Siddiki and A. Satsuma, *ACS Catalysis*,

- 2013, **3**, 998-1005.
14. H. Su, P. Gao, M. Y. Wang, G. Y. Zhai, J. J. Zhang, T. J. Zhao, J. Su, M. Antonietti, X. H. Li and J. S. Chen, *Angew Chem Int Ed Engl*, 2018, **57**, 15194-15198.
  15. L. Wang, X. Jv, R. Wang, L. Ma, J. Liu, J. Sun, T. Shi, L. Zhao, X. Zhang and B. Wang, *ACS Sustainable Chemistry & Engineering*, 2022, **10**, 8342-8349.
  16. Y. Zou, L. Dong, S. Yan, J. Liu, L. Mu, L. Li, Y. Hu, H. Qi, S. Mao and Z. Chen, *Journal of Catalysis*, 2024, **429**.
  17. D. Zhang, J. Tian, Y. Yan, L. Zhang and H. Hu, *Arabian Journal of Chemistry*, 2023, **16**.
